# Supplementary material for: Relationship between Photosynthetic Characteristics, Anatomical Structure, and Physiological Indexes of Two Halophytes in Different Habitats
Source: MDPI journal article supplement (doi:10.3390/f13122189), 2022-12-19
Supplement: s1 [file s1]

## Supplementary information

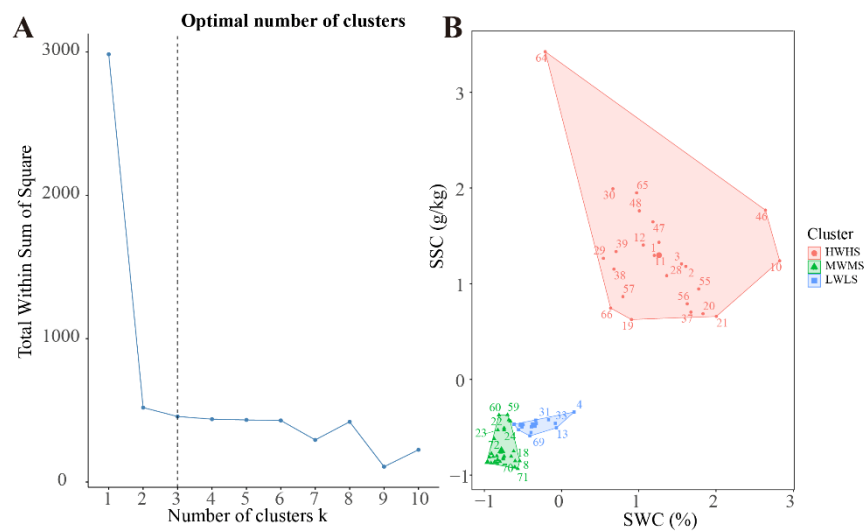

**Supplementary Figure S1.** K-means clustering results of soil water and salt of *N. sibirica* and *A. sparsifolia* crown. **(A)** The optimal K value; **(B)** K-means clustering results of soil water and salt. SWC, soil water content; SSC, soil salinity content

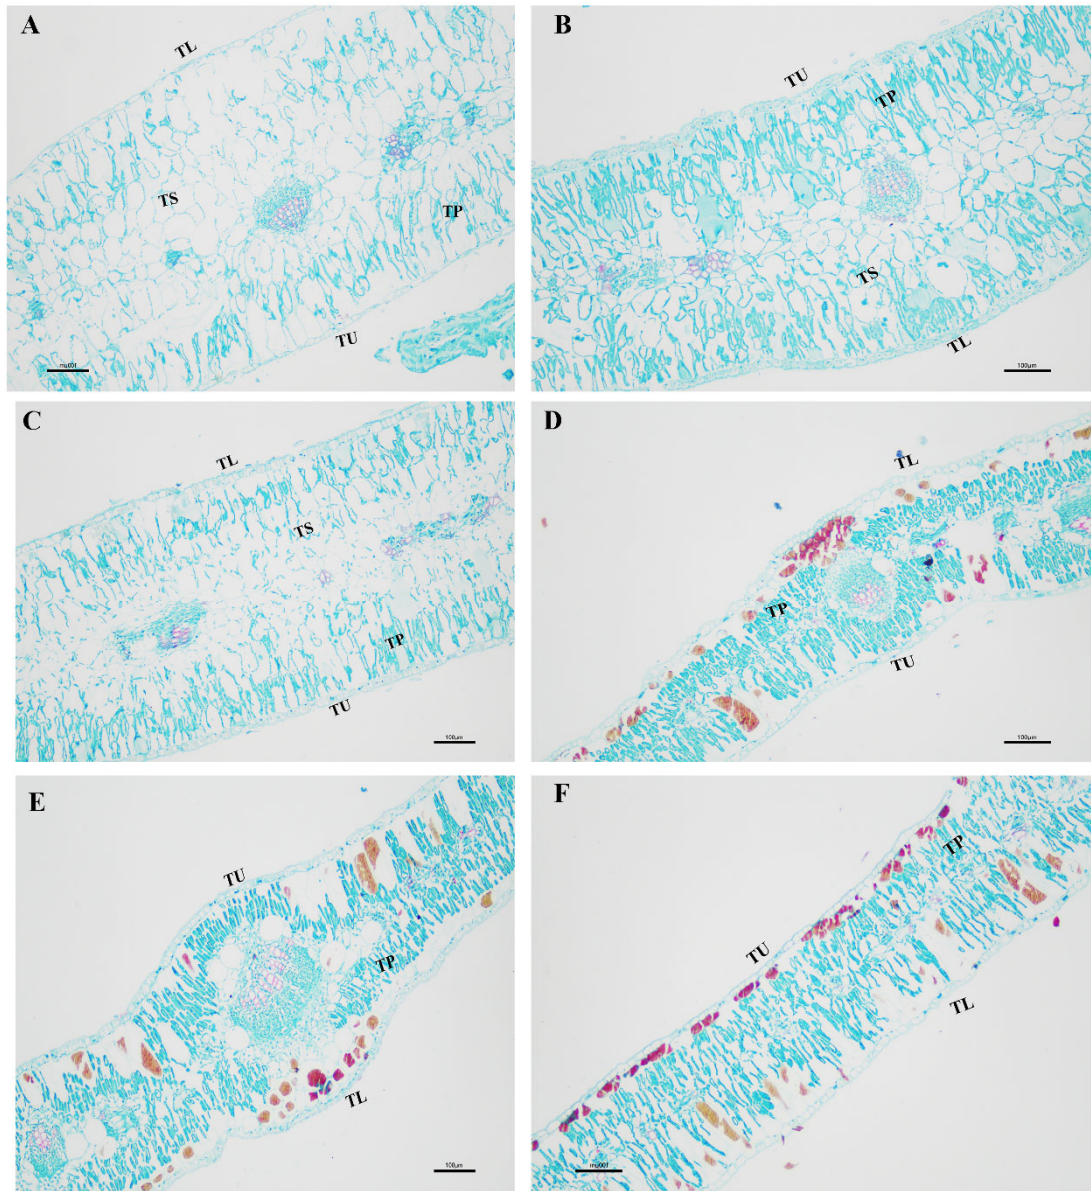

**Supplementary Figure S2.** The leaf slice dissected structure of *N. sibirica* and *A. sparsifolia* under different plots. (A) Leaf slice dissected structure of *N. sibirica* under HWHS; (B) Leaf slice dissected structure of *N. sibirica* under MWMS; (C) Leaf slice dissected structure of *N. sibirica* under LWLS; (D) Leaf slice dissected structure of *A. sparsifolia* under HWHS; (E) Leaf slice dissected structure of *A. sparsifolia* under MWMS; (F) Leaf slice dissected structure of *A. sparsifolia* under LWLS; TU, thickness of upper epidermis; TL, thickness of lower epidermis; TP, thickness of palisade tissue; TS, thickness of sponge tissue. Bars, 100 μm.

**Table S1** Photosynthetic gas exchange parameters of *N.sibirica* and *A.sparsifolia* under different water and salt plots

| Species | Plots | $P_n$<br>( $\mu\text{mol m}^{-2}\text{s}^{-1}$ ) | $G_s$<br>( $\text{mmol m}^{-2}\text{s}^{-1}$ ) | $Tr$<br>( $\text{mmol m}^{-2}\text{s}^{-1}$ ) | $C_i$<br>( $\mu\text{mol mol}^{-1}$ ) |
|---------|-------|--------------------------------------------------|------------------------------------------------|-----------------------------------------------|---------------------------------------|
| NS      | HWHS  | 8.99±3.03 <sup>A</sup>                           | 0.14±0.04 <sup>A</sup>                         | 2.27±1.52 <sup>B</sup>                        | 294.87±19.26 <sup>A</sup>             |
|         | MWMS  | 9.52±2.36 <sup>A</sup>                           | 0.16±0.00 <sup>AB</sup>                        | 3.65±2.37 <sup>A</sup>                        | 183.72±70.10 <sup>B</sup>             |
|         | LWLS  | 6.31±2.81 <sup>B</sup>                           | 0.01±0.12 <sup>B</sup>                         | 4.38±3.07 <sup>A</sup>                        | 298.23±67.55 <sup>A</sup>             |
| AS      | HWHS  | 2.02±0.50 <sup>B</sup>                           | 0.04±0.02 <sup>A</sup>                         | 1.72±0.69 <sup>AB</sup>                       | 289.10±33.81 <sup>A</sup>             |
|         | MWMS  | 3.61±0.85 <sup>A</sup>                           | 0.02±0.01 <sup>B</sup>                         | 1.27±0.53 <sup>B</sup>                        | 149.40±41.50 <sup>B</sup>             |
|         | LWLS  | 7.50±4.39 <sup>A</sup>                           | 0.05±0.03 <sup>A</sup>                         | 2.77±1.55 <sup>A</sup>                        | 140.65±40.30 <sup>B</sup>             |

Note: NS represents *N. sibirica*; AS represents *A. sparsifolia*; Different capital letters (A, B) indicate significant differences at the 0.05 ( $P < 0.05$ ) level among different plots.
